# Supplementary material for: Efficient quasi-solid-state dye-sensitized solar cells aided by mesoporous TiO2 beads and a non-volatile gel polymer electrolyte
Source: Royal Society of Chemistry journal article supplement (doi:10.1039/d3ce00126a), 2023-01-01
Supplement: d3ce00126a1.pdf [file d3ce00126a1.pdf]

## Supplementary Information

### **Efficient quasi-solid-state dye-sensitized solar cells aided by mesoporous TiO<sub>2</sub> beads and a non-volatile gel polymer electrolyte**

N. Mohsenzadegan<sup>a</sup>, E. Nouri<sup>a</sup>, M.R. Mohammadi<sup>b,\*</sup>

<sup>a</sup> Department of Materials Science and Engineering, Sharif University of Technology, Tehran, Iran

<sup>b</sup> School of Science and Engineering, University of Dundee, Dundee DD1 4HN, UK

\* Corresponding author: E-mail: [mmohammadi001@dundee.ac.uk](mailto:mmohammadi001@dundee.ac.uk)

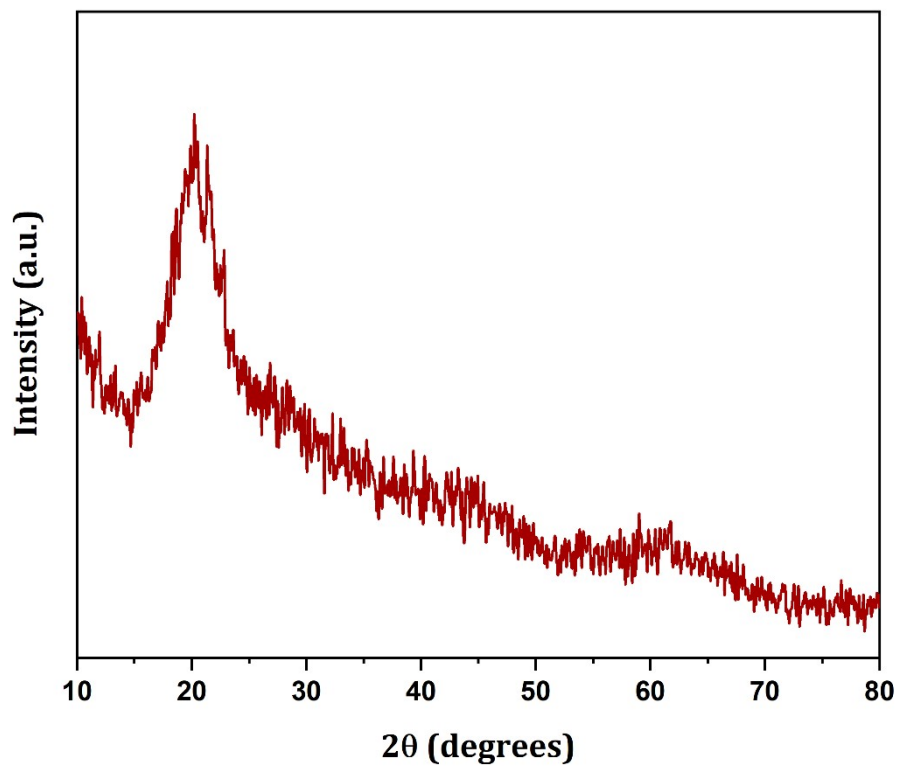

**Figure S1.** XRD pattern of mesoporous TiO<sub>2</sub> beads after sol-gel and before solvothermal process.

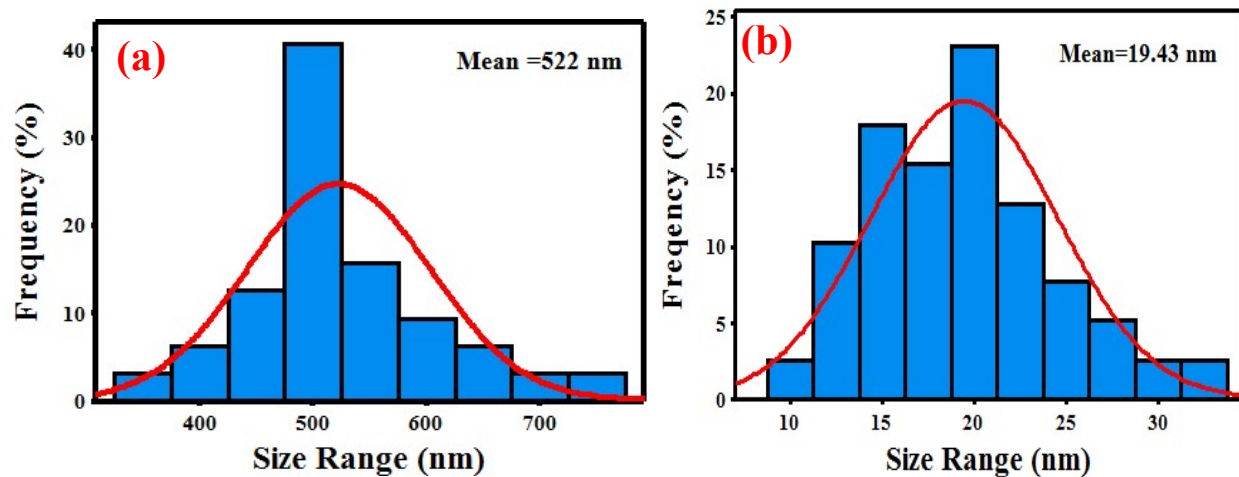

**Figure S2.** Histograms with distribution fits for TiO<sub>2</sub> nanoparticles (a) and TiO<sub>2</sub> mesoporous beads (b).

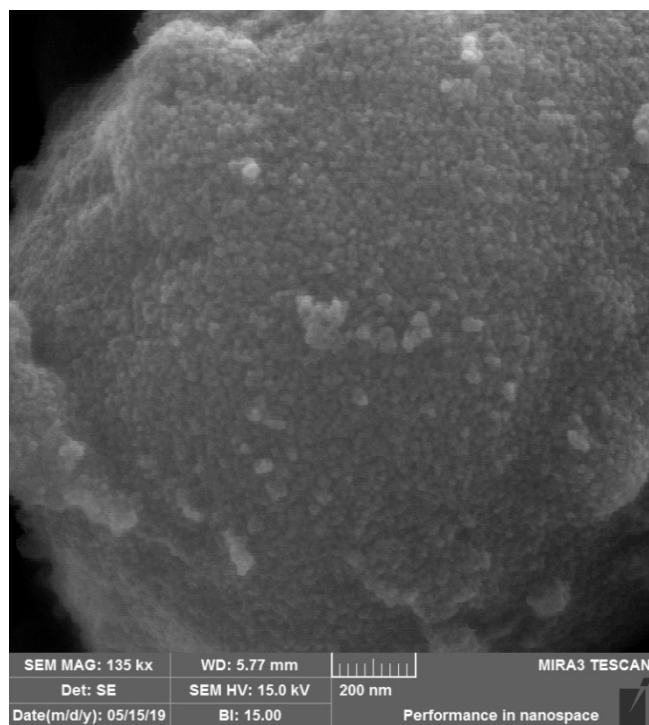

**Figure S3.** FESEM images of TiO<sub>2</sub> nanoparticles as reference sample.

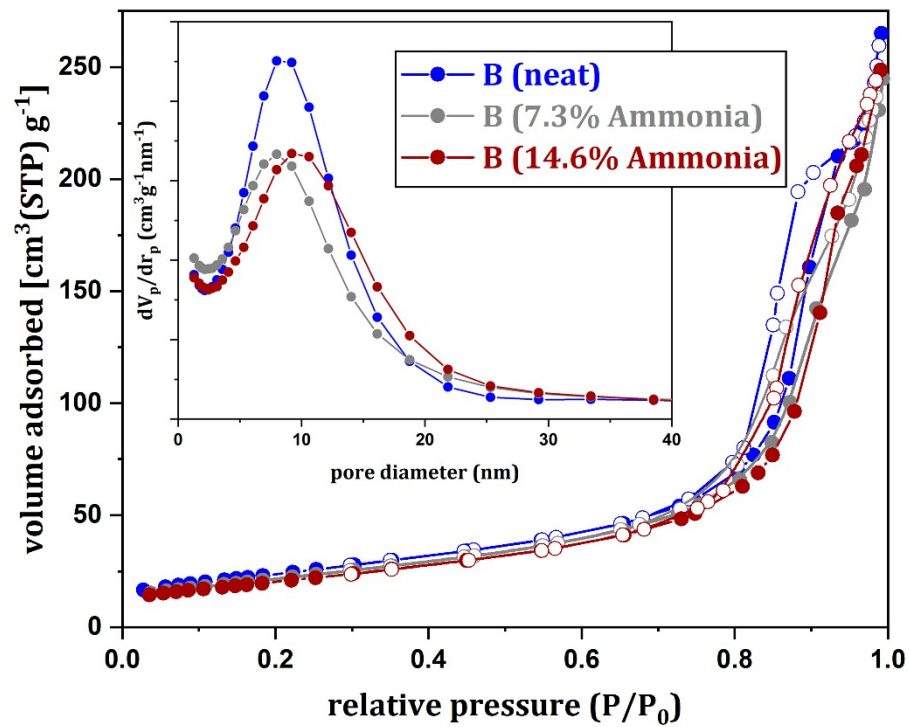

**Figure S4.** Isotherm plots of  $N_2$  gas adsorbed-desorbed versus relative pressure increases for synthesized mesoporous  $TiO_2$  beads with different ammonia contents in solvothermal process.

Inset shows the corresponding plots of pore size distribution.

**Table S1.** N<sub>2</sub> adsorption–desorption metrics of different samples, extracted from **Figure S4**.

| Sample                   | S <sub>BET</sub> (m <sup>2</sup> g <sup>-1</sup> ) | V <sub>P</sub> (Cm <sup>3</sup> g <sup>-1</sup> ) | $\bar{D}_P$<br>(nm) | r <sub>p</sub> (nm) |
|--------------------------|----------------------------------------------------|---------------------------------------------------|---------------------|---------------------|
| <b>B (neat)</b>          | 85.00                                              | 0.40                                              | 19.05               | 8.04                |
| <b>B (7.3% ammonia)</b>  | 78                                                 | 0.36                                              | 18.66               | 8.12                |
| <b>B (14.6% ammonia)</b> | 72.8                                               | 0.38                                              | 21.04               | 9.91                |

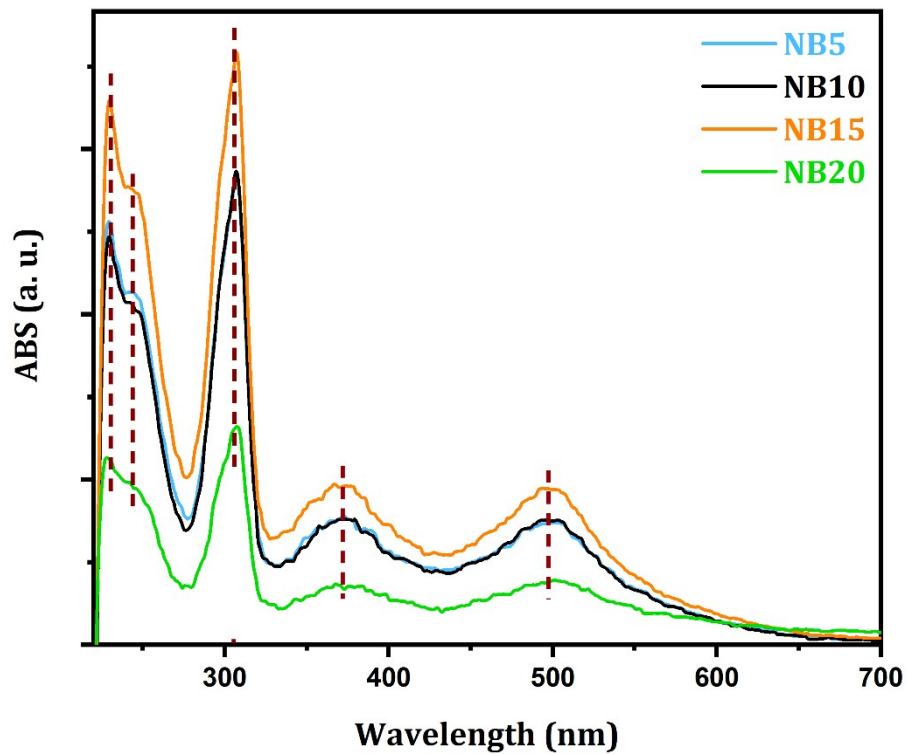

**Figure S5.** UV-vis absorption spectra of N719-dye molecules desorbed from surface of TiO<sub>2</sub> nanoparticle photoanodes with 5, 10, 15 and 20 wt.% contents of mesoporous TiO<sub>2</sub> beads.

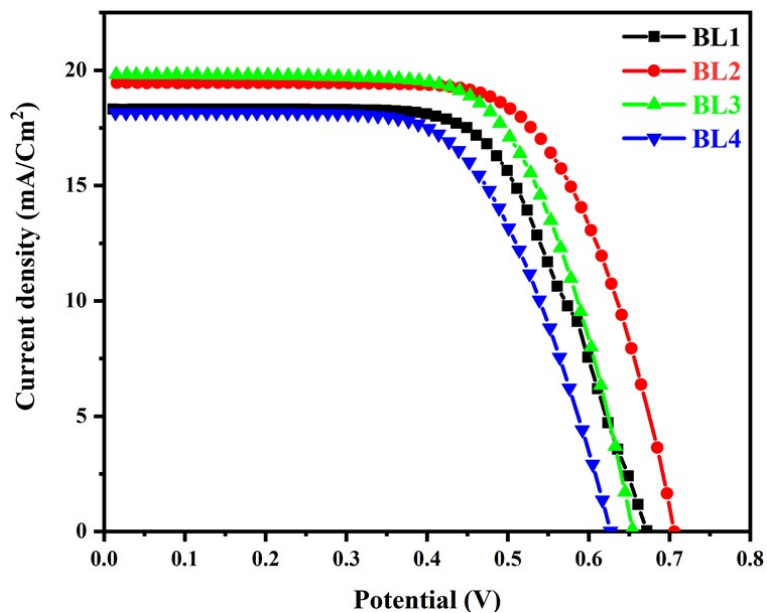

**Figure S6.** Photocurrent density versus voltage (J-V) curves of DSSCs made of double layer photoanodes based on mesoporous TiO<sub>2</sub> beads (B) with different thicknesses in the presence of liquid polymer electrolyte. The photovoltaic metrics were recorded with a scanning rate of 50 mV s<sup>-1</sup> under AM 1.5 illumination.



**Table S2.** Photovoltaic metrics of fabricated DSSCs in the presence of liquid electrolyte,

| <b>Photoanode Architecture</b> | <b>Photoanode Thickness (<math>\mu\text{m}</math>)</b> | <b><math>J_{\text{SC}}</math> (<math>\text{mA}/\text{cm}^2</math>)</b> | <b><math>V_{\text{OC}}</math> (V)</b> | <b>FF</b> | <b>Efficiency (%)</b> |
|--------------------------------|--------------------------------------------------------|------------------------------------------------------------------------|---------------------------------------|-----------|-----------------------|
| <b>B</b>                       | 13.4                                                   | 18.3                                                                   | 0.67                                  | 0.64      | 7.93                  |
|                                | 18.5                                                   | 19.5                                                                   | 0.70                                  | 0.67      | 9.28                  |
|                                | 21.7                                                   | 19.8                                                                   | 0.65                                  | 0.67      | 8.70                  |
|                                | 26.8                                                   | 18.2                                                                   | 0.62                                  | 0.63      | 7.25                  |

extracted from **Figure S6**.
